# Supplementary material for: The hidden features of fullerene rotation in the crystal lattice
Source: Royal Society of Chemistry journal article supplement (doi:10.1039/d4qi01562b), 2024-01-01
Supplement: d4qi01562b1.pdf [file d4qi01562b1.pdf]

## The hidden features of fullerene rotation in the crystal lattice

Yajuan Hao,<sup>2,3</sup> Yaofeng Wang,<sup>2</sup> Christian Feiler,<sup>4</sup> Manfred S. Weiss,<sup>4</sup> Alexey A. Popov,<sup>2\*</sup> Fupin Liu<sup>1\*</sup>

<sup>1</sup> Jiangsu Key Laboratory of New Power Batteries, School of Chemistry and Materials Science, Nanjing Normal University, Nanjing 210023, China

<sup>2</sup> Leibniz Institute for Solid State and Materials Research (IFW Dresden), Helmholtzstr. 20, 01069, Dresden, Germany

<sup>3</sup> School of Electrical and Mechanical Engineering, Pingdingshan University, Pingdingshan 467000, China

<sup>4</sup> Macromolecular Crystallography (BESSY-MX), Elektronenspeicherring BESSY II, Helmholtz Zentrum Berlin, Albert-Einstein-Str. 15, 12489 Berlin, Germany

E-Mail: a.popov@ifw-dresden.de, liu\_fupin@nnu.edu.cn

### Contents

|                                                                                                                                               |    |
|-----------------------------------------------------------------------------------------------------------------------------------------------|----|
| 1. Crystal data of the crystal <b>1</b> .....                                                                                                 | 2  |
| 2. Crystal data of the crystal <b>2</b> .....                                                                                                 | 3  |
| 3. Crystal data of the crystal <b>3</b> .....                                                                                                 | 4  |
| 4. Crystal site occupancies and temperature relations .....                                                                                   | 9  |
| 5. Sc–N bond length and temperature relations .....                                                                                           | 10 |
| 6. Asymmetric unit of the crystal $\text{Sc}_3\text{N@C}_{70}\cdot\text{NiOEP}\cdot 0.5(\text{C}_6\text{H}_6)\cdot\text{C}_7\text{H}_8$ ..... | 11 |
| 7. Cage carbon volume represents site occupancy to show the fullerene rotation driven by temperature .....                                    | 12 |
| 8. Site occupancy of NiOEP orientation <b>I</b> and the temperature relations .....                                                           | 12 |
| 9. The molecules surrounding $\text{Sc}_3\text{N@C}_{70}$ .....                                                                               | 13 |

1. Crystal data of the crystal **1**

**Table S1. Crystal data\_Sc<sub>3</sub>N@C<sub>2v</sub>(7854)-C<sub>70</sub>\_crystal 1.**

| Crystal                                            | Sc <sub>3</sub> N@C <sub>70</sub> ·NiOEP·0.5(C <sub>6</sub> H <sub>6</sub> )·C <sub>7</sub> H <sub>8</sub> | Sc <sub>3</sub> N@C <sub>70</sub> ·NiOEP·0.5(C <sub>6</sub> H <sub>6</sub> )·C <sub>7</sub> H <sub>8</sub> |                                                                                              |
|----------------------------------------------------|------------------------------------------------------------------------------------------------------------|------------------------------------------------------------------------------------------------------------|----------------------------------------------------------------------------------------------|
| Formula                                            | C <sub>116</sub> H <sub>55</sub> N <sub>5</sub> NiSc <sub>3</sub>                                          | C <sub>116</sub> H <sub>55</sub> N <sub>5</sub> NiSc <sub>3</sub>                                          |                                                                                              |
| Formula weight                                     | 1712.24                                                                                                    | 1712.24                                                                                                    |                                                                                              |
| Color, habit                                       | Black, block                                                                                               | Black, block                                                                                               |                                                                                              |
| Crystal system                                     | monoclinic                                                                                                 | monoclinic                                                                                                 |                                                                                              |
| Space group                                        | <i>P</i> 2 <sub>1</sub> / <i>c</i>                                                                         | <i>P</i> 2 <sub>1</sub> / <i>c</i>                                                                         |                                                                                              |
| <i>a</i> , Å                                       | 17.210(3)                                                                                                  | 17.210(3)                                                                                                  |                                                                                              |
| <i>b</i> , Å                                       | 16.420(3)                                                                                                  | 16.420(3)                                                                                                  |                                                                                              |
| <i>c</i> , Å                                       | 25.760(5)                                                                                                  | 25.760(5)                                                                                                  |                                                                                              |
| <i>α</i> , deg                                     | 90                                                                                                         | 90                                                                                                         |                                                                                              |
| <i>β</i> , deg                                     | 106.31(3)                                                                                                  | 106.31(3)                                                                                                  |                                                                                              |
| <i>γ</i> , deg                                     | 90                                                                                                         | 90                                                                                                         |                                                                                              |
| Volume, Å <sup>3</sup>                             | 6987(3)                                                                                                    | 6987(3)                                                                                                    |                                                                                              |
| <i>Z</i>                                           | 4                                                                                                          | 4                                                                                                          |                                                                                              |
| <i>T</i> , K                                       | 100                                                                                                        | 100                                                                                                        |                                                                                              |
| Radiation (λ, Å)                                   | Synchrotron Radiation (0.7999)                                                                             | Synchrotron Radiation (0.7999)                                                                             |                                                                                              |
| Unique data ( <i>R</i> <sub>int</sub> )            | 21856 (0.0497)                                                                                             | 21856 (0.0497)                                                                                             |                                                                                              |
| Parameters                                         | 1544                                                                                                       | 2176                                                                                                       |                                                                                              |
| Restraints                                         | 438                                                                                                        | 3591                                                                                                       |                                                                                              |
| Observed data ( <i>I</i> > 2σ( <i>I</i> ))         | 17902                                                                                                      | 17902                                                                                                      |                                                                                              |
| <i>R</i> <sub>1</sub> <sup>a</sup> (observed data) | 0.0805 <sup>c</sup>                                                                                        | 0.0670 <sup>c</sup>                                                                                        | 0.0667 <sup>d</sup>                                                                          |
| <i>wR</i> <sub>2</sub> <sup>b</sup> (all data)     | 0.2380 <sup>c</sup>                                                                                        | 0.2010 <sup>c</sup>                                                                                        | 0.2005 <sup>d</sup>                                                                          |
| Solvent model                                      | C <sub>7</sub> H <sub>8</sub> /0.5(C <sub>6</sub> H <sub>6</sub> ) <sup>c</sup>                            | C <sub>7</sub> H <sub>8</sub> / 0.5(C <sub>6</sub> H <sub>6</sub> ) <sup>c</sup>                           | 0.898(C <sub>7</sub> H <sub>8</sub> )/<br>0.479(C <sub>6</sub> H <sub>6</sub> ) <sup>d</sup> |
| CCDC NO.                                           | 2035908                                                                                                    | 2362043                                                                                                    |                                                                                              |

<sup>a</sup>For data with *I* > 2σ(*I*),  $R_1 = \frac{\sum ||F_o| - |F_c||}{\sum |F_o|}$ . <sup>b</sup>For all data,  $wR_2 = \sqrt{\frac{\sum [w(F_o^2 - F_c^2)^2]}{\sum [w(F_o^2)^2]}}$ .

<sup>c</sup>Refined with solvent occupancies fixed to 1:0.5. <sup>d</sup>Refined with free solvent occupancies.

## 2. Crystal data of the crystal 2

**Table S2. Crystal data  $\text{Sc}_3\text{N@C}_{2v}(7854)\text{-C}_{70}$  crystal 2.**

| Crystal                            | $\text{Sc}_3\text{N@C}_{70}\text{-NiOEP}\cdot 0.5(\text{C}_6\text{H}_6)\cdot \text{C}_7\text{H}_8$ |                                                            | $\text{Sc}_3\text{N@C}_{70}\text{-NiOEP}\cdot 0.5(\text{C}_6\text{H}_6)\cdot \text{C}_7\text{H}_8$ |                                                           |
|------------------------------------|----------------------------------------------------------------------------------------------------|------------------------------------------------------------|----------------------------------------------------------------------------------------------------|-----------------------------------------------------------|
| Formula                            | $\text{C}_{116}\text{H}_{55}\text{N}_5\text{NiSc}_3$                                               |                                                            | $\text{C}_{116}\text{H}_{55}\text{N}_5\text{NiSc}_3$                                               |                                                           |
| Formula weight                     | 1712.24                                                                                            |                                                            | 1712.24                                                                                            |                                                           |
| Color, habit                       | Black, block                                                                                       |                                                            | Black, block                                                                                       |                                                           |
| Crystal system                     | monoclinic                                                                                         |                                                            | monoclinic                                                                                         |                                                           |
| Space group                        | $P2_1/c$                                                                                           |                                                            | $P2_1/c$                                                                                           |                                                           |
| $a$ , Å                            | 17.200(3)                                                                                          |                                                            | 17.260(3)                                                                                          |                                                           |
| $b$ , Å                            | 16.420(3)                                                                                          |                                                            | 16.460(3)                                                                                          |                                                           |
| $c$ , Å                            | 25.750(5)                                                                                          |                                                            | 25.790(5)                                                                                          |                                                           |
| $\alpha$ , deg                     | 90                                                                                                 |                                                            | 90                                                                                                 |                                                           |
| $\beta$ , deg                      | 106.34(3)                                                                                          |                                                            | 106.30(3)                                                                                          |                                                           |
| $\gamma$ , deg                     | 90                                                                                                 |                                                            | 90                                                                                                 |                                                           |
| Volume, Å <sup>3</sup>             | 6979(3)                                                                                            |                                                            | 7032(3)                                                                                            |                                                           |
| Z                                  | 4                                                                                                  |                                                            | 4                                                                                                  |                                                           |
| T, K                               | 50                                                                                                 |                                                            | 80                                                                                                 |                                                           |
| Radiation ( $\lambda$ , Å)         | Synchrotron Radiation (0.895)                                                                      |                                                            | Synchrotron Radiation (0.895)                                                                      |                                                           |
| Unique data ( $R_{int}$ )          | 12045 (0.0934)                                                                                     |                                                            | 9665 (0.1243)                                                                                      |                                                           |
| Parameters                         | 2177                                                                                               |                                                            | 2177                                                                                               |                                                           |
| Restraints                         | 3545                                                                                               |                                                            | 3537                                                                                               |                                                           |
| Observed data ( $I > 2\sigma(I)$ ) | 10866                                                                                              |                                                            | 9139                                                                                               |                                                           |
| $R_1^a$ (observed data)            | 0.0822 <sup>c</sup>                                                                                | 0.0818 <sup>d</sup>                                        | 0.0858 <sup>c</sup>                                                                                | 0.0856 <sup>d</sup>                                       |
| $wR_2^b$ (all data)                | 0.2370 <sup>c</sup>                                                                                | 0.2369 <sup>d</sup>                                        | 0.2419 <sup>c</sup>                                                                                | 0.2425 <sup>d</sup>                                       |
| Solvent model                      | $\text{C}_7\text{H}_8/0.5(\text{C}_6\text{H}_6)^c$                                                 | $0.915(\text{C}_7\text{H}_8)/0.47(\text{C}_6\text{H}_6)^d$ | $\text{C}_7\text{H}_8/0.5(\text{C}_6\text{H}_6)^c$                                                 | $0.94(\text{C}_7\text{H}_8)/0.47(\text{C}_6\text{H}_6)^d$ |
| CCDC NO.                           | 2362044                                                                                            |                                                            | 2362045                                                                                            |                                                           |

<sup>a</sup>For data with  $I > 2\sigma(I)$ ,  $R_1 = \frac{\sum||F_o|-|F_c||}{\sum|F_o|}$ . <sup>b</sup>For all data,  $wR_2 = \sqrt{\frac{\sum[w(F_o^2 - F_c^2)^2]}{\sum[w(F_o^2)^2]}}$ .

<sup>c</sup>Refined with solvent occupancies fixed to 1:0.5. <sup>d</sup>Refined with free solvent occupancies.

### 3. Crystal data of the crystal 3

**Table S3. Crystal data\_Sc<sub>3</sub>N@C<sub>2v</sub>(7854)-C<sub>70</sub>\_crystal 3.**

| Crystal                                            | Sc <sub>3</sub> N@C <sub>70</sub> ·NiOEP·0.5(C <sub>6</sub> H <sub>6</sub> )·C <sub>7</sub> H <sub>8</sub> | Sc <sub>3</sub> N@C <sub>70</sub> ·NiOEP·0.5(C <sub>6</sub> H <sub>6</sub> )·C <sub>7</sub> H <sub>8</sub> | Sc <sub>3</sub> N@C <sub>70</sub> ·NiOEP·0.5(C <sub>6</sub> H <sub>6</sub> )·C <sub>7</sub> H <sub>8</sub> | Sc <sub>3</sub> N@C <sub>70</sub> ·NiOEP·0.5(C <sub>6</sub> H <sub>6</sub> )·C <sub>7</sub> H <sub>8</sub> |
|----------------------------------------------------|------------------------------------------------------------------------------------------------------------|------------------------------------------------------------------------------------------------------------|------------------------------------------------------------------------------------------------------------|------------------------------------------------------------------------------------------------------------|
| Formula                                            | C <sub>116</sub> H <sub>55</sub> N <sub>5</sub> NiSc <sub>3</sub>                                          | C <sub>116</sub> H <sub>55</sub> N <sub>5</sub> NiSc <sub>3</sub>                                          | C <sub>116</sub> H <sub>55</sub> N <sub>5</sub> NiSc <sub>3</sub>                                          | C <sub>116</sub> H <sub>55</sub> N <sub>5</sub> NiSc <sub>3</sub>                                          |
| Formula weight                                     | 1712.24                                                                                                    | 1712.24                                                                                                    | 1712.24                                                                                                    | 1712.24                                                                                                    |
| Color, habit                                       | Black, block                                                                                               | Black, block                                                                                               | Black, block                                                                                               | Black, block                                                                                               |
| Crystal system                                     | monoclinic                                                                                                 | monoclinic                                                                                                 | monoclinic                                                                                                 | monoclinic                                                                                                 |
| Space group                                        | <i>P</i> 2 <sub>1</sub> / <i>c</i>                                                                         |
| <i>a</i> , Å                                       | 17.220(3)                                                                                                  | 17.240(3)                                                                                                  | 17.240(3)                                                                                                  | 17.240(3)                                                                                                  |
| <i>b</i> , Å                                       | 16.430(3)                                                                                                  | 16.440(3)                                                                                                  | 16.440(3)                                                                                                  | 16.440(3)                                                                                                  |
| <i>c</i> , Å                                       | 25.760(5)                                                                                                  | 25.760(5)                                                                                                  | 25.760(5)                                                                                                  | 25.760(5)                                                                                                  |
| <i>α</i> , deg                                     | 90                                                                                                         | 90                                                                                                         | 90                                                                                                         | 90                                                                                                         |
| <i>β</i> , deg                                     | 106.30(3)                                                                                                  | 106.27(3)                                                                                                  | 106.27(3)                                                                                                  | 106.27(3)                                                                                                  |
| <i>γ</i> , deg                                     | 90                                                                                                         | 90                                                                                                         | 90                                                                                                         | 90                                                                                                         |
| Volume, Å <sup>3</sup>                             | 6995(3)                                                                                                    | 7009(3)                                                                                                    | 7009(3)                                                                                                    | 7009(3)                                                                                                    |
| <i>Z</i>                                           | 4                                                                                                          | 4                                                                                                          | 4                                                                                                          | 4                                                                                                          |
| <i>T</i> , K                                       | 100                                                                                                        | 110                                                                                                        | 110                                                                                                        | 110                                                                                                        |
| Radiation (λ, Å)                                   | Synchrotron Radiation (0.82656)                                                                            | Synchrotron Radiation (0.82656)                                                                            | Synchrotron Radiation (0.82656)                                                                            | Synchrotron Radiation (0.82656)                                                                            |
| Unique data ( <i>R</i> <sub>int</sub> )            | 17803 (0.0223)                                                                                             | 17823 (0.0281)                                                                                             | 17823 (0.0281)                                                                                             | 17823 (0.0281)                                                                                             |
| Parameters                                         | 2176                                                                                                       | 2176                                                                                                       | 2176                                                                                                       | 2176                                                                                                       |
| Restraints                                         | 3486                                                                                                       | 3454                                                                                                       | 3454                                                                                                       | 3454                                                                                                       |
| Observed data ( <i>I</i> > 2σ( <i>I</i> ))         | 16969                                                                                                      | 16858                                                                                                      | 16858                                                                                                      | 16858                                                                                                      |
| <i>R</i> <sub>1</sub> <sup>a</sup> (observed data) | 0.0628 <sup>c</sup>                                                                                        | 0.0624 <sup>d</sup>                                                                                        | 0.0665 <sup>c</sup>                                                                                        | 0.0661 <sup>d</sup>                                                                                        |
| <i>wR</i> <sub>2</sub> <sup>b</sup> (all data)     | 0.1813 <sup>c</sup>                                                                                        | 0.1802 <sup>d</sup>                                                                                        | 0.1928 <sup>c</sup>                                                                                        | 0.1921 <sup>d</sup>                                                                                        |
| Solvent model                                      | C <sub>7</sub> H <sub>8</sub> /0.5(C <sub>6</sub> H <sub>6</sub> ) <sup>c</sup>                            | 0.93(C <sub>7</sub> H <sub>8</sub> )/<br>0.482(C <sub>6</sub> H <sub>6</sub> ) <sup>d</sup>                | C <sub>7</sub> H <sub>8</sub> /0.5(C <sub>6</sub> H <sub>6</sub> ) <sup>c</sup>                            | 0.93(C <sub>7</sub> H <sub>8</sub> )/<br>0.476(C <sub>6</sub> H <sub>6</sub> ) <sup>d</sup>                |
| CCDC NO.                                           | 2362046                                                                                                    | 2362047                                                                                                    | 2362047                                                                                                    | 2362047                                                                                                    |

<sup>a</sup>For data with *I* > 2σ(*I*),  $R_1 = \frac{\sum ||F_o| - |F_c||}{\sum |F_o|}$ . <sup>b</sup>For all data,  $wR_2 = \sqrt{\frac{\sum [w(F_o^2 - F_c^2)^2]}{\sum [w(F_o^2)^2]}}$ .

<sup>c</sup>Refined with solvent occupancies fixed to 1:0.5. <sup>d</sup>Refined with free solvent occupancies.

Table S3. Crystal data\_Sc<sub>3</sub>N@C<sub>2v</sub>(7854)-C<sub>70</sub>\_crystal 3\_continued.

| Crystal                                     | Sc <sub>3</sub> N@C <sub>70</sub> ·NiOEP·0.5(C <sub>6</sub> H <sub>6</sub> )·C <sub>7</sub> H <sub>8</sub> |                                                                                              | Sc <sub>3</sub> N@C <sub>70</sub> ·NiOEP·0.5(C <sub>6</sub> H <sub>6</sub> )·C <sub>7</sub> H <sub>8</sub> |                                                                                              |
|---------------------------------------------|------------------------------------------------------------------------------------------------------------|----------------------------------------------------------------------------------------------|------------------------------------------------------------------------------------------------------------|----------------------------------------------------------------------------------------------|
| Formula                                     | C <sub>116</sub> H <sub>55</sub> N <sub>5</sub> NiSc <sub>3</sub>                                          |                                                                                              | C <sub>116</sub> H <sub>55</sub> N <sub>5</sub> NiSc <sub>3</sub>                                          |                                                                                              |
| Formula weight                              | 1712.24                                                                                                    |                                                                                              | 1712.24                                                                                                    |                                                                                              |
| Color, habit                                | Black, block                                                                                               |                                                                                              | Black, block                                                                                               |                                                                                              |
| Crystal system                              | monoclinic                                                                                                 |                                                                                              | monoclinic                                                                                                 |                                                                                              |
| Space group                                 | P2 <sub>1</sub> /c                                                                                         |                                                                                              | P2 <sub>1</sub> /c                                                                                         |                                                                                              |
| a, Å                                        | 17.270(3)                                                                                                  |                                                                                              | 17.300(4)                                                                                                  |                                                                                              |
| b, Å                                        | 16.440(3)                                                                                                  |                                                                                              | 16.440(3)                                                                                                  |                                                                                              |
| c, Å                                        | 25.740(5)                                                                                                  |                                                                                              | 25.710(5)                                                                                                  |                                                                                              |
| α, deg                                      | 90                                                                                                         |                                                                                              | 90                                                                                                         |                                                                                              |
| β, deg                                      | 106.22(3)                                                                                                  |                                                                                              | 106.17(3)                                                                                                  |                                                                                              |
| γ, deg                                      | 90                                                                                                         |                                                                                              | 90                                                                                                         |                                                                                              |
| Volume, Å <sup>3</sup>                      | 7017(3)                                                                                                    |                                                                                              | 7023(3)                                                                                                    |                                                                                              |
| Z                                           | 4                                                                                                          |                                                                                              | 4                                                                                                          |                                                                                              |
| T, K                                        | 120                                                                                                        |                                                                                              | 130                                                                                                        |                                                                                              |
| Radiation (λ, Å)                            | Synchrotron Radiation (0.82656)                                                                            |                                                                                              | Synchrotron Radiation (0.82656)                                                                            |                                                                                              |
| Unique data (R <sub>int</sub> )             | 17812 (0.0316)                                                                                             |                                                                                              | 17809 (0.0358)                                                                                             |                                                                                              |
| Parameters                                  | 2176                                                                                                       |                                                                                              | 2176                                                                                                       |                                                                                              |
| Restraints                                  | 3448                                                                                                       |                                                                                              | 3459                                                                                                       |                                                                                              |
| Observed data (I > 2σ(I))                   | 16577                                                                                                      |                                                                                              | 16140                                                                                                      |                                                                                              |
| R <sub>1</sub> <sup>a</sup> (observed data) | 0.0737 <sup>c</sup>                                                                                        | 0.0733 <sup>d</sup>                                                                          | 0.0831 <sup>c</sup>                                                                                        | 0.0829 <sup>d</sup>                                                                          |
| wR <sub>2</sub> <sup>b</sup> (all data)     | 0.2178 <sup>c</sup>                                                                                        | 0.2162 <sup>d</sup>                                                                          | 0.2561 <sup>c</sup>                                                                                        | 0.2557 <sup>d</sup>                                                                          |
| Solvent model                               | C <sub>7</sub> H <sub>8</sub> /0.5(C <sub>6</sub> H <sub>6</sub> ) <sup>c</sup>                            | 0.934(C <sub>7</sub> H <sub>8</sub> )/<br>0.482(C <sub>6</sub> H <sub>6</sub> ) <sup>d</sup> | C <sub>7</sub> H <sub>8</sub> /0.5(C <sub>6</sub> H <sub>6</sub> ) <sup>c</sup>                            | 0.946(C <sub>7</sub> H <sub>8</sub> )/<br>0.472(C <sub>6</sub> H <sub>6</sub> ) <sup>d</sup> |
| CCDC NO.                                    | 2362048                                                                                                    |                                                                                              | 2362049                                                                                                    |                                                                                              |

<sup>a</sup>For data with  $I > 2\sigma(I)$ ,  $R_1 = \frac{\sum ||F_o| - |F_c||}{\sum |F_o|}$ . <sup>b</sup>For all data,  $wR_2 = \sqrt{\frac{\sum [w(F_o^2 - F_c^2)]^2}{\sum [w(F_o^2)]^2}}$ .

<sup>c</sup>Refined with solvent occupancies fixed to 1:0.5. <sup>d</sup>Refined with free solvent occupancies.

Table S3. Crystal data\_Sc<sub>3</sub>N@C<sub>2v</sub>(7854)-C<sub>70</sub>\_crystal 3\_continued.

| Crystal                                     | Sc <sub>3</sub> N@C <sub>70</sub> ·NiOEP·0.5(C <sub>6</sub> H <sub>6</sub> )·C <sub>7</sub> H <sub>8</sub> |                                                                                              | Sc <sub>3</sub> N@C <sub>70</sub> ·NiOEP·0.5(C <sub>6</sub> H <sub>6</sub> )·C <sub>7</sub> H <sub>8</sub> |                                                                                            |
|---------------------------------------------|------------------------------------------------------------------------------------------------------------|----------------------------------------------------------------------------------------------|------------------------------------------------------------------------------------------------------------|--------------------------------------------------------------------------------------------|
| Formula                                     | C <sub>116</sub> H <sub>55</sub> N <sub>5</sub> NiSc <sub>3</sub>                                          |                                                                                              | C <sub>116</sub> H <sub>55</sub> N <sub>5</sub> NiSc <sub>3</sub>                                          |                                                                                            |
| Formula weight                              | 1712.24                                                                                                    |                                                                                              | 1712.24                                                                                                    |                                                                                            |
| Color, habit                                | Black, block                                                                                               |                                                                                              | Black, block                                                                                               |                                                                                            |
| Crystal system                              | monoclinic                                                                                                 |                                                                                              | monoclinic                                                                                                 |                                                                                            |
| Space group                                 | P2 <sub>1</sub> /c                                                                                         |                                                                                              | P2 <sub>1</sub> /c                                                                                         |                                                                                            |
| a, Å                                        | 17.330(4)                                                                                                  |                                                                                              | 17.340(4)                                                                                                  |                                                                                            |
| b, Å                                        | 16.450(3)                                                                                                  |                                                                                              | 16.460(3)                                                                                                  |                                                                                            |
| c, Å                                        | 25.680(5)                                                                                                  |                                                                                              | 25.660(5)                                                                                                  |                                                                                            |
| α, deg                                      | 90                                                                                                         |                                                                                              | 90                                                                                                         |                                                                                            |
| β, deg                                      | 106.10(3)                                                                                                  |                                                                                              | 106.06(3)                                                                                                  |                                                                                            |
| γ, deg                                      | 90                                                                                                         |                                                                                              | 90                                                                                                         |                                                                                            |
| Volume, Å <sup>3</sup>                      | 7034(3)                                                                                                    |                                                                                              | 7038(3)                                                                                                    |                                                                                            |
| Z                                           | 4                                                                                                          |                                                                                              | 4                                                                                                          |                                                                                            |
| T, K                                        | 140                                                                                                        |                                                                                              | 150                                                                                                        |                                                                                            |
| Radiation (λ, Å)                            | Synchrotron Radiation (0.82656)                                                                            |                                                                                              | Synchrotron Radiation (0.82656)                                                                            |                                                                                            |
| Unique data (R <sub>int</sub> )             | 17870 (0.0567)                                                                                             |                                                                                              | 17870 (0.0389)                                                                                             |                                                                                            |
| Parameters                                  | 2176                                                                                                       |                                                                                              | 2175                                                                                                       |                                                                                            |
| Restraints                                  | 3462                                                                                                       |                                                                                              | 3702                                                                                                       |                                                                                            |
| Observed data (I > 2σ(I))                   | 15275                                                                                                      |                                                                                              | 14044                                                                                                      |                                                                                            |
| R <sub>1</sub> <sup>a</sup> (observed data) | 0.0939 <sup>c</sup>                                                                                        | 0.0936 <sup>d</sup>                                                                          | 0.1002 <sup>c</sup>                                                                                        | 0.1001 <sup>d</sup>                                                                        |
| wR <sub>2</sub> <sup>b</sup> (all data)     | 0.2929 <sup>c</sup>                                                                                        | 0.2930 <sup>d</sup>                                                                          | 0.3406 <sup>c</sup>                                                                                        | 0.3410 <sup>d</sup>                                                                        |
| Solvent model                               | C <sub>7</sub> H <sub>8</sub> /0.5(C <sub>6</sub> H <sub>6</sub> ) <sup>c</sup>                            | 0.972(C <sub>7</sub> H <sub>8</sub> )/<br>0.476(C <sub>6</sub> H <sub>6</sub> ) <sup>d</sup> | C <sub>7</sub> H <sub>8</sub> /0.5(C <sub>6</sub> H <sub>6</sub> ) <sup>c</sup>                            | 0.947(C <sub>7</sub> H <sub>8</sub> )/<br>0.5(C <sub>6</sub> H <sub>6</sub> ) <sup>d</sup> |
| CCDC NO.                                    | 2362050                                                                                                    |                                                                                              | 2362051                                                                                                    |                                                                                            |

<sup>a</sup>For data with  $I > 2\sigma(I)$ ,  $R_1 = \frac{\sum||F_o|-|F_c||}{\sum|F_o|}$ . <sup>b</sup>For all data,  $wR_2 = \sqrt{\frac{\sum[w(F_o^2 - F_c^2)^2]}{\sum[w(F_o^2)^2]}}$ .

<sup>c</sup>Refined with solvent occupancies fixed to 1:0.5. <sup>d</sup>Refined with free solvent occupancies.

Table S3. Crystal data\_Sc<sub>3</sub>N@C<sub>2v</sub>(7854)-C<sub>70</sub>\_crystal 3\_continued.

| Crystal                                            | Sc <sub>3</sub> N@C <sub>70</sub> ·NiOEP·0.5(C <sub>6</sub> H <sub>6</sub> )·C <sub>7</sub> H <sub>8</sub> | Sc <sub>3</sub> N@C <sub>70</sub> ·NiOEP·0.5(C <sub>6</sub> H <sub>6</sub> )·C <sub>7</sub> H <sub>8</sub> |                                                                                 |
|----------------------------------------------------|------------------------------------------------------------------------------------------------------------|------------------------------------------------------------------------------------------------------------|---------------------------------------------------------------------------------|
| Formula                                            | C <sub>116</sub> H <sub>55</sub> N <sub>5</sub> NiSc <sub>3</sub>                                          | C <sub>116</sub> H <sub>55</sub> N <sub>5</sub> NiSc <sub>3</sub>                                          |                                                                                 |
| Formula weight                                     | 1712.24                                                                                                    | 1712.24                                                                                                    |                                                                                 |
| Color, habit                                       | Black, block                                                                                               | Black, block                                                                                               |                                                                                 |
| Crystal system                                     | monoclinic                                                                                                 | monoclinic                                                                                                 |                                                                                 |
| Space group                                        | <i>P</i> 2 <sub>1</sub> / <i>c</i>                                                                         | <i>C</i> 2/ <i>m</i>                                                                                       |                                                                                 |
| <i>a</i> , Å                                       | 17.350(4)                                                                                                  | 25.680(5)                                                                                                  |                                                                                 |
| <i>b</i> , Å                                       | 16.480(3)                                                                                                  | 16.500(3)                                                                                                  |                                                                                 |
| <i>c</i> , Å                                       | 25.660(5)                                                                                                  | 17.320(4)                                                                                                  |                                                                                 |
| <i>α</i> , deg                                     | 90                                                                                                         | 90                                                                                                         |                                                                                 |
| <i>β</i> , deg                                     | 106.04(3)                                                                                                  | 106.04(3)                                                                                                  |                                                                                 |
| <i>γ</i> , deg                                     | 90                                                                                                         | 90                                                                                                         |                                                                                 |
| Volume, Å <sup>3</sup>                             | 7051(3)                                                                                                    | 7053(3)                                                                                                    |                                                                                 |
| <i>Z</i>                                           | 4                                                                                                          | 4                                                                                                          |                                                                                 |
| <i>T</i> , K                                       | 160                                                                                                        | 170                                                                                                        |                                                                                 |
| Radiation (λ, Å)                                   | Synchrotron Radiation (0.82656)                                                                            | Synchrotron Radiation (0.82656)                                                                            |                                                                                 |
| Unique data ( <i>R</i> <sub>int</sub> )            | 17763 (0.0286)                                                                                             | 9084 (0.0204)                                                                                              |                                                                                 |
| Parameters                                         | 2176                                                                                                       | 899                                                                                                        |                                                                                 |
| Restraints                                         | 3702                                                                                                       | 1314                                                                                                       |                                                                                 |
| Observed data ( <i>I</i> > 2σ( <i>I</i> ))         | 12971                                                                                                      | 7345                                                                                                       |                                                                                 |
| <i>R</i> <sub>1</sub> <sup>a</sup> (observed data) | 0.1101 <sup>c</sup>                                                                                        | 0.1100 <sup>d</sup>                                                                                        | 0.1101 <sup>c</sup>                                                             |
| <i>wR</i> <sub>2</sub> <sup>b</sup> (all data)     | 0.3955 <sup>c</sup>                                                                                        | 0.3955 <sup>d</sup>                                                                                        | 0.3725 <sup>c</sup>                                                             |
| Solvent model                                      | C <sub>7</sub> H <sub>8</sub> /0.5(C <sub>6</sub> H <sub>6</sub> ) <sup>c</sup>                            | 0.959(C <sub>7</sub> H <sub>8</sub> )/<br>0.498(C <sub>6</sub> H <sub>6</sub> ) <sup>d</sup>               | C <sub>7</sub> H <sub>8</sub> /0.5(C <sub>6</sub> H <sub>6</sub> ) <sup>c</sup> |
| CCDC NO.                                           | 2362052                                                                                                    | 2362053                                                                                                    |                                                                                 |

<sup>a</sup>For data with *I* > 2σ(*I*),  $R_1 = \frac{\sum ||F_o| - |F_c||}{\sum |F_o|}$ . <sup>b</sup>For all data,  $wR_2 = \sqrt{\frac{\sum [w(F_o^2 - F_c^2)^2]}{\sum [w(F_o^2)^2]}}$ .

<sup>c</sup>Refined with solvent occupancies fixed to 1:0.5. <sup>d</sup>Refined with free solvent occupancies.

Table S3. Crystal data\_Sc<sub>3</sub>N@C<sub>2v</sub>(7854)-C<sub>70</sub>\_crystal 3\_continued.

| Crystal                                            | Sc <sub>3</sub> N@C <sub>70</sub> ·NiOEP·0.5(C <sub>6</sub> H <sub>6</sub> )·C <sub>7</sub> H <sub>8</sub> | Sc <sub>3</sub> N@C <sub>70</sub> ·NiOEP·0.5(C <sub>6</sub> H <sub>6</sub> )·C <sub>7</sub> H <sub>8</sub> |
|----------------------------------------------------|------------------------------------------------------------------------------------------------------------|------------------------------------------------------------------------------------------------------------|
| Formula                                            | C <sub>116</sub> H <sub>55</sub> N <sub>5</sub> NiSc <sub>3</sub>                                          | C <sub>116</sub> H <sub>55</sub> N <sub>5</sub> NiSc <sub>3</sub>                                          |
| Formula weight                                     | 1712.24                                                                                                    | 1712.24                                                                                                    |
| Color, habit                                       | Black, block                                                                                               | Black, block                                                                                               |
| Crystal system                                     | monoclinic                                                                                                 | monoclinic                                                                                                 |
| Space group                                        | C2/m                                                                                                       | C2/m                                                                                                       |
| <i>a</i> , Å                                       | 25.680(5)                                                                                                  | 25.680(5)                                                                                                  |
| <i>b</i> , Å                                       | 16.500(3)                                                                                                  | 16.510(3)                                                                                                  |
| <i>c</i> , Å                                       | 17.350(4)                                                                                                  | 17.370(4)                                                                                                  |
| <i>α</i> , deg                                     | 90                                                                                                         | 90                                                                                                         |
| <i>β</i> , deg                                     | 106.03(3)                                                                                                  | 106.02(3)                                                                                                  |
| <i>γ</i> , deg                                     | 90                                                                                                         | 90                                                                                                         |
| Volume, Å <sup>3</sup>                             | 7066(3)                                                                                                    | 7078(3)                                                                                                    |
| Z                                                  | 4                                                                                                          | 4                                                                                                          |
| T, K                                               | 180                                                                                                        | 190                                                                                                        |
| Radiation (λ, Å)                                   | Synchrotron Radiation (0.82656)                                                                            | Synchrotron Radiation (0.82656)                                                                            |
| Unique data ( <i>R</i> <sub>int</sub> )            | 9170 (0.0198)                                                                                              | 9231 (0.0231)                                                                                              |
| Parameters                                         | 899                                                                                                        | 899                                                                                                        |
| Restraints                                         | 1320                                                                                                       | 1320                                                                                                       |
| Observed data ( <i>I</i> > 2σ( <i>I</i> ))         | 7506                                                                                                       | 7793                                                                                                       |
| <i>R</i> <sub>1</sub> <sup>a</sup> (observed data) | 0.1046                                                                                                     | 0.1016                                                                                                     |
| <i>wR</i> <sub>2</sub> <sup>b</sup> (all data)     | 0.3555                                                                                                     | 0.3433                                                                                                     |
| Solvent model                                      | C <sub>7</sub> H <sub>8</sub> /0.5(C <sub>6</sub> H <sub>6</sub> )                                         | C <sub>7</sub> H <sub>8</sub> /0.5(C <sub>6</sub> H <sub>6</sub> )                                         |
| CCDC NO.                                           | 2362054                                                                                                    | 2362055                                                                                                    |

<sup>a</sup>For data with *I* > 2σ(*I*),  $R_1 = \frac{\sum ||F_o| - |F_c||}{\sum |F_o|}$ . <sup>b</sup>For all data,  $wR_2 = \sqrt{\frac{\sum [w(F_o^2 - F_c^2)^2]}{\sum [w(F_o^2)^2]}}$ .



#### 4. Crystal site occupancies and temperature relations

**Table S4. Site occupancies vs temperature.**

| Temperature (K) | Site occupancy ratio of fullerene orientations I:II | Site occupancy ratio of NiOEP orientations I:II | Ni-Ni distance (Å) <sup>a</sup> | Crystal label |
|-----------------|-----------------------------------------------------|-------------------------------------------------|---------------------------------|---------------|
| 100             | 0.7649(17):0.2351(17)                               | 0.8999(9):0.1001(9)                             | 0.6204(6)                       | 1             |
| 160             | 0.5:0.5                                             | 0.5:0.5 <sup>b</sup>                            |                                 | 1             |
| 220             | 0.5:0.5                                             | 0.5:0.5 <sup>b</sup>                            |                                 | 1             |
| 50              | 0.793(3):0.207(3)                                   | 0.8896(16):0.1104(16)                           | 0.6254(8)                       | 2             |
| 80              | 0.744(3):0.256(3)                                   | 0.8729(19):0.1271(19)                           | 0.613(2)                        | 2             |
| 100             | 0.7885(17):0.2115(17)                               | 0.9266(10):0.0734(10)                           | 0.6107(6)                       | 3             |
| 110             | 0.7535(17):0.2465(17)                               | 0.9126(10):0.0874(10)                           | 0.5956(6)                       | 3             |
| 120             | 0.7104(18):0.2896(18)                               | 0.8916(11):0.1084(11)                           | 0.5792(7)                       | 3             |
| 130             | 0.6604(18):0.3396(18)                               | 0.8514(12):0.1486(12)                           | 0.5529(7)                       | 3             |
| 140             | 0.5999(17):0.4001(17)                               | 0.7859(13):0.2141(13)                           | 0.5236(8)                       | 3             |
| 150             | 0.5586(14):0.4414(14)                               | 0.7085(14):0.2915(14)                           | 0.489(2)                        | 3             |
| 160             | 0.5244(12):0.4756(12)                               | 0.6572(13):0.3428(13)                           | 0.466(2)                        | 3             |
| 170             | 0.5:0.5                                             | 0.5:0.5 <sup>b</sup>                            |                                 | 3             |
| 180             | 0.5:0.5                                             | 0.5:0.5 <sup>b</sup>                            |                                 | 3             |
| 190             | 0.5:0.5                                             | 0.5:0.5 <sup>b</sup>                            |                                 | 3             |

<sup>a</sup>the Ni-Ni distance is distance between two orientations I and II of NiOEP at low temperatures. <sup>b</sup> the NiOEP shows clear disorder with translational moving character like that observed at low temperatures, the short distance and thermal vibration at high temperature obstacle the stable refinement of NiOEP orientations I and II, the refinement applied one position (with unit occupancy) with elongated thermal ellipsoids. It is reasonable to assign the value as 0.5:0.5.

5. Sc–N bond length and temperature relations

**Table S5. Sc–N bond lengths (Å) vs temperature.**

| Temperature (K) | Sc–N bonds at main position     | Sc–N bonds at minor position | Crystal label |
|-----------------|---------------------------------|------------------------------|---------------|
| <b>100</b>      | 2.041(4), 1.978(4), 2.042(3)    | 2.00(2), 2.00(2), 2.04(2)    | <b>1</b>      |
| <b>160</b>      | 2.030(3), 1.996(3), 2.014(3)    | 2.030(3), 1.996(3), 2.014(3) | <b>1</b>      |
| <b>220</b>      | 2.012(3), 1.978(3), 2.014(3)    | 2.012(3), 1.978(3), 2.014(3) | <b>1</b>      |
| <b>50</b>       | 2.038(6), 1.975(7), 2.057(7)    | 2.02(3), 2.00(3), 2.08(3)    | <b>2</b>      |
| <b>80</b>       | 2.036(9), 1.983(10), 2.053(10)  | 2.01(3), 1.96(3), 2.08(3)    | <b>2</b>      |
| <b>100</b>      | 2.038(9), 1.989(8), 2.040(7)    | 2.00(4), 1.96(4), 2.06(4)    | <b>3</b>      |
| <b>110</b>      | 2.040(10), 1.990(8), 2.033(8)   | 1.97(3), 1.95(3), 2.09(3)    | <b>3</b>      |
| <b>120</b>      | 2.044(10), 1.990(8), 2.026(8)   | 1.97(3), 1.94(3), 2.10(3)    | <b>3</b>      |
| <b>130</b>      | 2.074(8), 1.970(9), 1.998(7)    | 1.89(2), 1.99(3), 2.16(3)    | <b>3</b>      |
| <b>140</b>      | 2.022(14), 1.954(12), 2.049(13) | 2.00(2), 1.96(2), 2.07(2)    | <b>3</b>      |
| <b>150</b>      | 1.998(16), 1.941(15), 2.067(15) | 2.013(19), 1.96(2), 2.05(2)  | <b>3</b>      |
| <b>160</b>      | 1.920(14), 1.98(2), 2.125(15)   | 2.10(2), 1.95(2), 1.96(2)    | <b>3</b>      |
| <b>170</b>      | 2.018(3), 1.989(3), 2.014(3)    | 2.018(3), 1.989(3), 2.014(3) | <b>3</b>      |
| <b>180</b>      | 2.020(3), 1.989(3), 2.015(3)    | 2.020(3), 1.989(3), 2.015(3) | <b>3</b>      |
| <b>190</b>      | 2.017(3), 1.986(3), 2.018(3)    | 2.017(3), 1.986(3), 2.018(3) | <b>3</b>      |

6. Asymmetric unit of the crystal  $\text{Sc}_3\text{N@C}_{70}\cdot\text{NiOEP}\cdot 0.5(\text{C}_6\text{H}_6)\cdot\text{C}_7\text{H}_8$

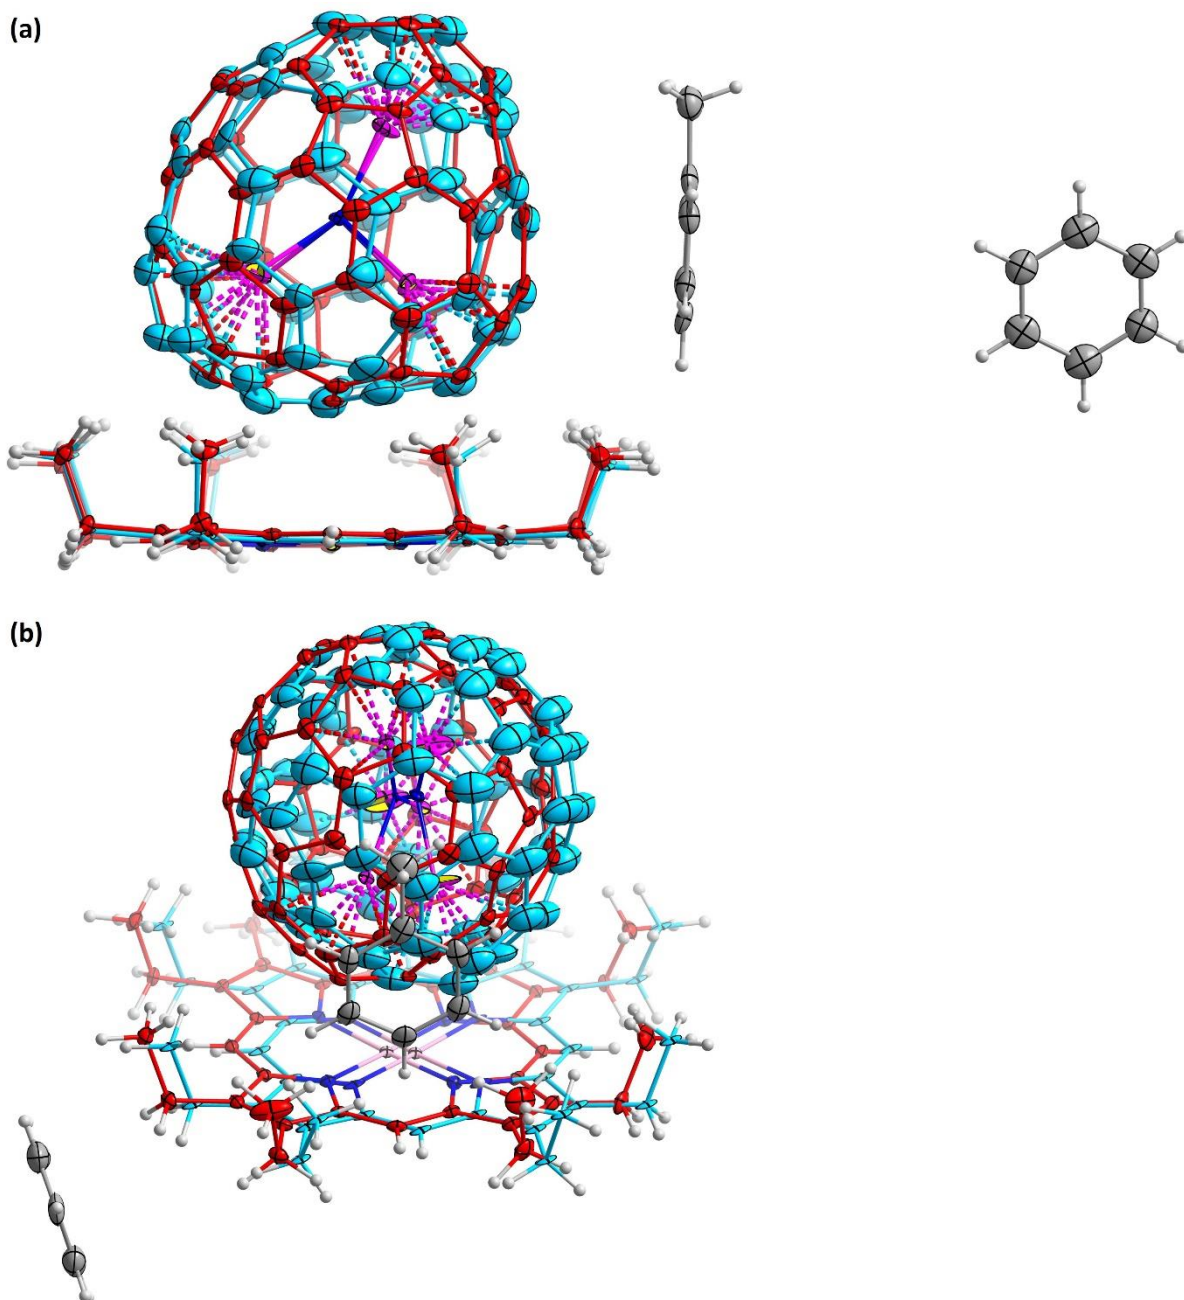

**Figure S1.** Structures of crystal **2** measured at 50 K. The asymmetric unit was viewed from two perpendicular directions (a, b). The benzene molecule sits on the crystal inversion center; thus, the asymmetric unit contains half benzene. The probability of thermal ellipsoid was set to 30%. Color code: grey for ordered C, red for disordered C with major occupancies, cyan for disordered C with minor occupancies, blue for N, white for H, pink for Sc, and rose for Ni.

7. Cage carbon volume represents site occupancy to show the fullerene rotation driven by temperature

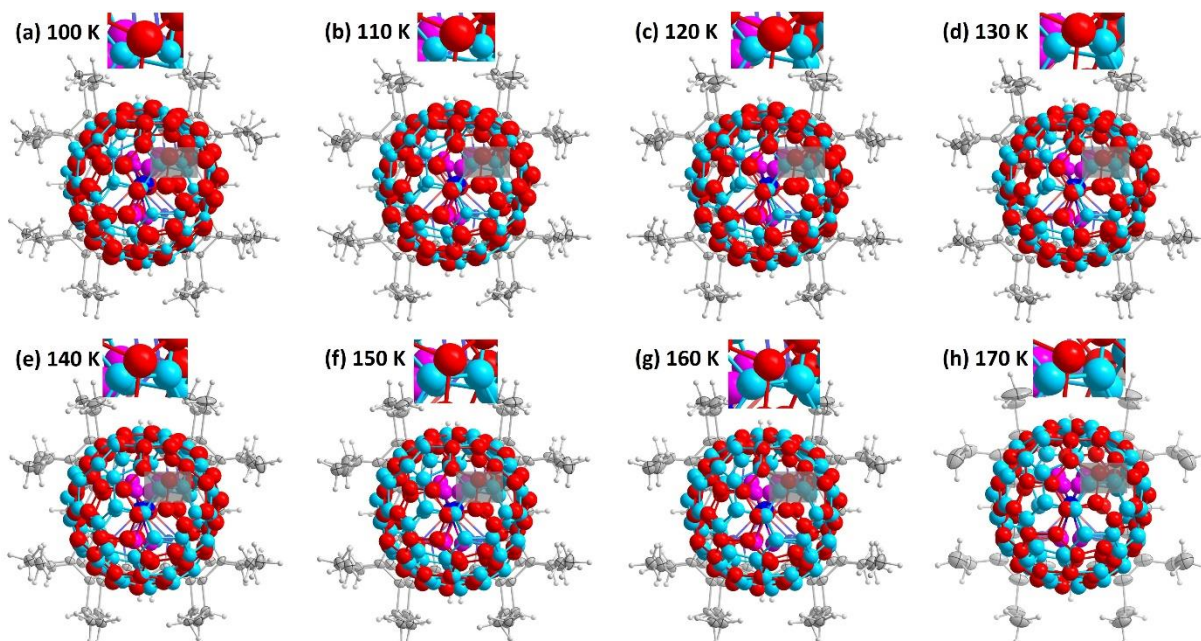

**Figure S2.** Structures of crystal **3** measured at 100 K (a), 110 K (b), 120 K (c), 130 K (d), 140 K (e), 150 K (f), 160 K (g), and 170 K (h). The solvent molecules were omitted for clarity. The probability of thermal ellipsoid was set to 30%. The two orientations of  $C_{70}$  were highlighted with red for I, and cyan for II, with the volume of the carbon atoms correlated to their site occupancies. The grey masked part was zoomed in to highlight the changes of the site occupancy with temperature. Color code: grey for C in general, blue for N, white for H, pink for Sc, and red for Ni.

8. Site occupancy of NiOEP orientation I and the temperature relations

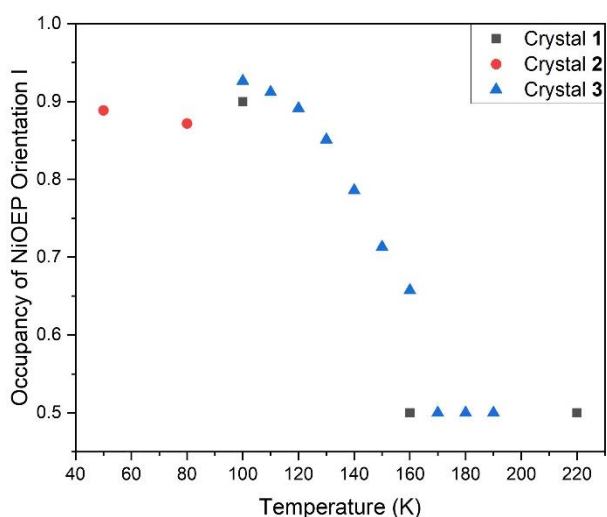

**Figure S3.** The site occupancy of NiOEP orientation I vs measurement temperature relations.

9. The molecules surrounding  $\text{Sc}_3\text{N@C}_{70}$

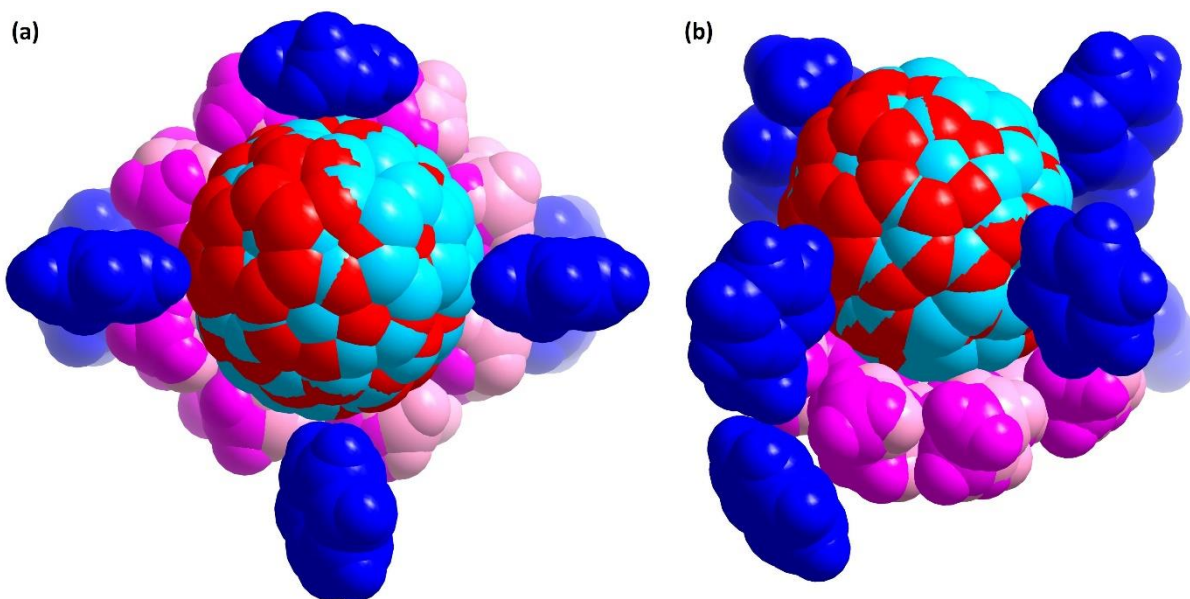

**Figure S4.** The space-filling structure of crystal **3** at 100 K viewed perpendicular to the NiOEP plane (a) and rotated to a different orientation (b) to show the environment of  $\text{Sc}_3\text{N@C}_{70}$ . Color codes: red/cyan for fullerene orientations I/II, pink/rose for NiOEP orientations I/II, blue for benzene/toluene molecules interacting with the fullerene cage and NiOEP.

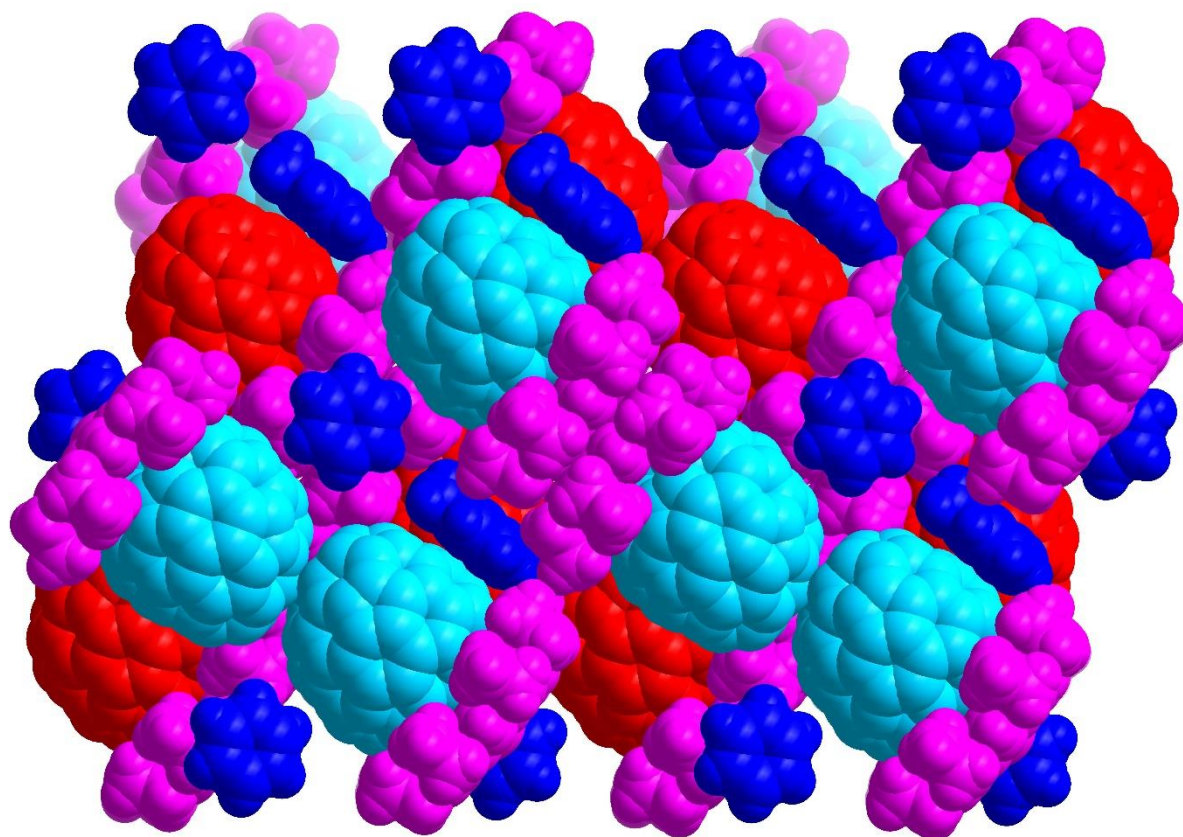

**Figure S5.** The space-filling structure of crystal **3** at 100 K viewed from the crystal *b* axis to show the environment of  $\text{Sc}_3\text{N@C}_{70}$ . Four-unit cells were shown in the figure. Color codes: red/cyan for fullerene orientations I/II, pink for NiOEP, blue for benzene/toluene molecules.
